# Supplementary material
Source: Springer Nature journal article supplement (https://www.springermedizin.de/resource/supplementary/12889_2009_1799_MOESM1_ESM.pdf/9504040)
Supplement: MOESM1 [file 9504040]

Primary school: Grade 1-8  
(children aged 3-13 years old)

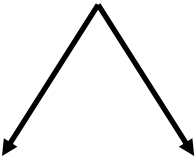

Grade 1-5  
(children aged 3-9 years old)

Grade 6-8  
(children aged 9-13 years old)

Questionnaires  
for parents (n= 7,231)

Questionnaires  
for parents (n=3,863)  
and children (n=3,863)
